# Supplementary material
Source: Springer Nature journal article supplement (https://www.springermedizin.de/resource/supplementary/13046_2010_318_MOESM4_ESM.pdf/9662114)
Supplement: MOESM4 [file 9662114]

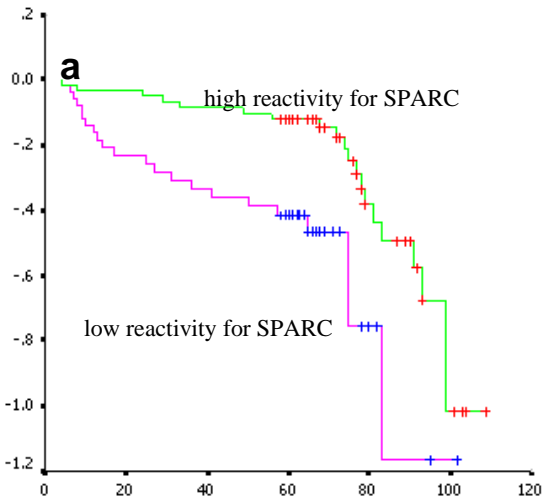

Overall Survival (months)

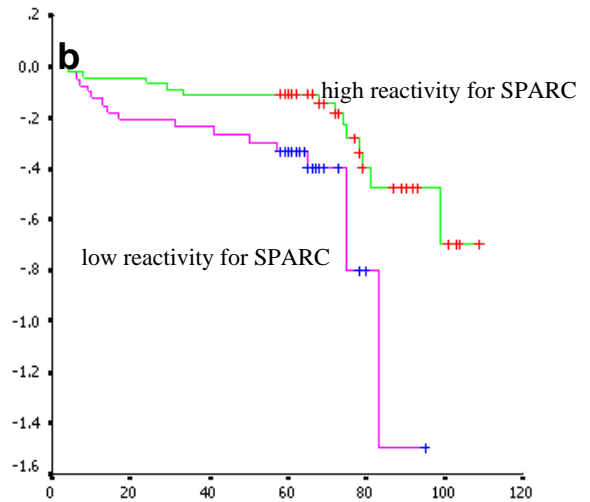

Disease-Free Survival (months)

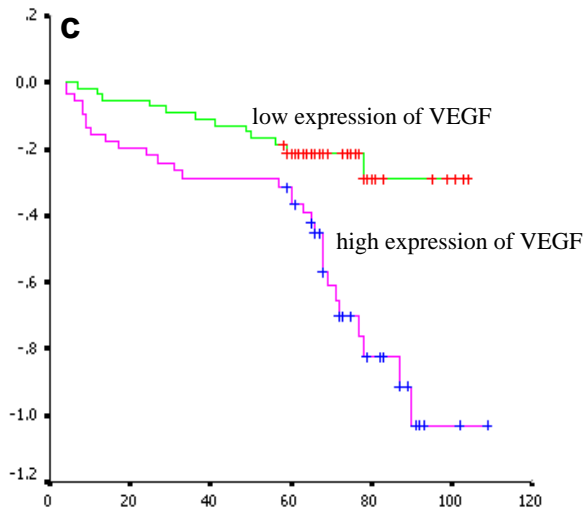

Overall Survival (months)

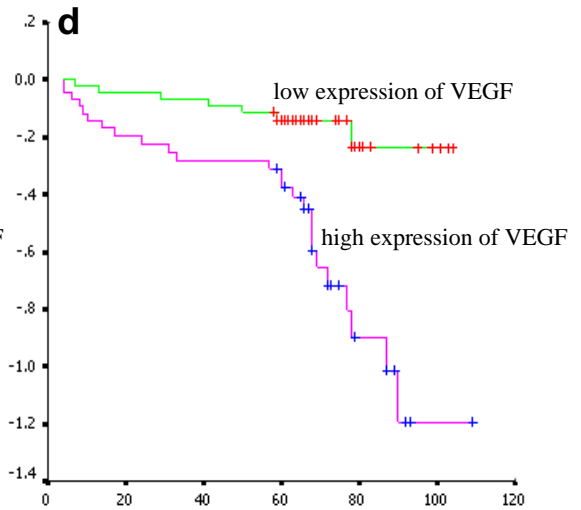

Disease-Free Survival (months)
